# Supplementary material
Source: PubMed Central journal article supplement (PMC8915306)
Supplement: bcr-2021-247954supp001.pdf [file bcr-2021-247954supp001.pdf]

**Table 1-** Supplementary material- Literature Review of demographic of patient, imaging and management of reported cases of Eagle Syndrome

| Case Report              | Demographics                                                  | Presentation                                               | Acute Imaging findings                                                           | Definitive Management                                                                           |
|--------------------------|---------------------------------------------------------------|------------------------------------------------------------|----------------------------------------------------------------------------------|-------------------------------------------------------------------------------------------------|
| Selvadurai et al 2021    | 17 Male- no comorbidities                                     | L arm and leg hemiparesis. One recurrent episode.          | MRI head/ CTA- R ICA Dissection with R MCA infarct.                              | Intravenous thrombolysis, oral anticoagulation and unilateral external approach styloidectomy   |
| Xhaxho et al 2021        | 64 Male- no comorbidities                                     | LOC, headache, R hemiparesis                               | CTA- L ICA Dissection + temporal infarct                                         | Medical stroke management. Delayed Styloidectomy                                                |
| Mattioli et al 2021      | 56 Male- hypertension, metabolic syndrome                     | LOC, confusion, blurred vision, dysarthria                 | CTA- L ICA dissection                                                            | Oral anticoagulant therapy                                                                      |
| Brassart et al 2020      | 53 Female- hyperlipidaemia                                    | L hemiplegia, tinnitus, palpitations                       | CT head- R frontal ischaemia. CTA- R ICA dissection and L carotid pseudoaneurysm | Oral anticoagulation therapy                                                                    |
| Horio et al 2020         | 46 Female- no comorbidities                                   | Reduced consciousness, R hemiparesis, aphasia              | CT head- L Frontal infarct. MRA- Bilateral ICA Dissection                        | Intravenous Thrombolysis, Oral antiplatelet therapy. Delayed Styloidectomy.                     |
| Duarte-Celada et al 2021 | 43 Female- no comorbidities                                   | Headache, Horner's syndrome                                | MRA- L cervical ICA Dissection                                                   | Bilateral endovascular stenting, antiplatelet therapy. Elective Bilateral Styloidectomy         |
| Ikenouchi et al 2020     | 30 Male- Ehlers-Danlos Syndrome                               | Sudden L hemiparesis                                       | MRA- Old L ICA dissection, new R ICA dissection                                  | Oral antiplatelet therapy                                                                       |
| Baldino et al 2020       | 41 Female- rheumatic fever, recurrent migraine, tonsillectomy | Not documented                                             | CTA- R ICA dissection with wide-necked false lumen aneurysm                      | Endovascular stent and oral antiplatelet therapy                                                |
| Baldino et al 2020       | 48 Male- previous tonsillectomy, hernia repair                | Acute R hemiparesis                                        | CTA- L ICA dissection distal to carotid bulb                                     | Anticoagulant therapy. Delayed external approach Styloidectomy. Lifelong Antiplatelet therapy.  |
| Baldino et al 2020       | 45 Male- no comorbidities                                     | L amaurosis fugax and intense headache                     | CTA- R ICA small intimal flap, L ICA dissection with false lumen thrombosis.     | Anticoagulant therapy. Bilateral external approach Styloidectomy. Lifelong Antiplatelet therapy |
| Baldino et al 2020       | 49 Male- no comorbidities                                     | Transient aphasia, tonsillar fossae pain, new hypertension | CTA- Bilateral cervical ICA dissection                                           | Anticoagulation- Bilateral external approach Styloidectomy. Life-long Anti-platelet therapy.    |
| Baldino et al 2020       | 56 Male- hypertension                                         | Transient LOC, and confusion                               | CTA- L cervical ICA dissection                                                   | Anticoagulation therapy. Await Styloidectomy.                                                   |
| Galletta et al 2019      | 53 Male- no comorbidities                                     | L hemiplegia, dysarthria, facial palsy                     | MRA- bilateral ICA/ MCA thrombus. CTA bilateral ICA dissections                  | Endovascular thrombectomy. Partial extra-oral approach removal of C1 process                    |

|                             |                                                     |                                                          |                                                                                                  |                                                                                                                   |
|-----------------------------|-----------------------------------------------------|----------------------------------------------------------|--------------------------------------------------------------------------------------------------|-------------------------------------------------------------------------------------------------------------------|
| <b>Torikoshi et al 2019</b> | <b>46 Male- no comorbidities</b>                    | <b>Reduced consciousness, L hemiplegia,</b>              | <b>MRI head- R frontal and parietal infarct. MRA/ CTA- Bilateral extracranial ICA dissection</b> | <b>Bilateral Endovascular stenting. Bilateral external approach Styloidectomy. Lifelong Antiplatelet therapy.</b> |
| Zammit et al 2018           | 45 Male- no comorbidities                           | R headache, tongue paraesthesia and Horner's.            | MRI head /CTA- bilateral ICA dissection with R subacute MCA infarct                              | Oral antiplatelets only.                                                                                          |
| <b>Jelodar et al 2018</b>   | <b>40 male- recurrent ischaemic stroke</b>          | <b>R hemi paresis and dysphasia.</b>                     | <b>CTA- bilateral ICA dissection</b>                                                             | <b>Antiplatelet therapy. Bilateral external approach Styloidectomy.</b>                                           |
| Smoot et al 2017            | 60 Male- diabetes, hypertension, childhood seizures | R headache, L hemiparesis, dysarthria                    | MRI head/ CTA- R ICA dissection with multiple MCA microinfarcts.                                 | Anticoagulation and R ICA stenting.                                                                               |
| Hebant et al 2017           | 57 Male- no comorbidities                           | Dysphasia                                                | MRI head/ CTA- L ICA dissection and L MCA infarct                                                | Oral antiplatelet therapy only                                                                                    |
| Subedi et al 2017           | 47 Female- diet controlled diabetes                 | Slurred speech and L arm hypaesthesia                    | MRI / CTA- R ICA dissection and hyperacute R MCA infarct.                                        | Intravenous thrombolysis, balloon angioplasty. Awaiting surgical intervention                                     |
| <b>Jo et al 2017</b>        | <b>38 Female- no comorbidities</b>                  | <b>L headache and perioral numbness</b>                  | <b>CTA- R ICA dissection. No infarct on MRI.</b>                                                 | <b>Oral antiplatelet therapy. Unilateral external approach Styloidectomy</b>                                      |
| Aydin et al 2015            | 57 Female- no comorbidities                         | L hemiparesis, hemifacial paralysis and dizziness        | MRI head / CTA- R ICA dissection and R MCA infarct.                                              | Oral anticoagulation only.                                                                                        |
| <b>Ogura et al 2015</b>     | <b>80 Male- hypertension, prostate hypertrophy</b>  | <b>Odynophagia</b>                                       | <b>CTA- L ICA dissection</b>                                                                     | <b>Unilateral external approach Styloidectomy</b>                                                                 |
| Ogura et al 2015            | 55 Male- no comorbidities                           | L hemiparesis                                            | MRI head/ CTA- R ICA dissection and R MCA infarct                                                | Endovascular thrombectomy, R ICA stenting, anticoagulation, antiplatelet therapy.                                 |
| <b>Ogura et al 2015</b>     | <b>55 Male- no comorbidities</b>                    | <b>L visual field loss.</b>                              | <b>MRI head / CTA- bilateral ICA dissection and multiple small L cerebral infarcts</b>           | <b>Intravenous anticoagulation. Bilateral external approach Styloidectomy and ICA stenting</b>                    |
| Yamamoto et al 2013         | 51 Male- no comorbidities                           | R orbital pain and Horner syndrome                       | MRI head/ MRA- R ICA dissection                                                                  | Antiplatelet therapy only.                                                                                        |
| <b>Sviesson et al 2013</b>  | <b>38 Male- no comorbidities</b>                    | <b>R hemiparesis, dysarthria and bifrontal headache.</b> | <b>CT head/CTA- L dense MCA sign and ICA dissection</b>                                          | <b>Intravenous thrombolysis, thombectomy and ICA stenting. Unilateral external approach Styloidectomy.</b>        |
| Sviesson et al 2013         | 41 Female- no comorbidities                         | R sudden onset headache.                                 | CTA- R ICA dissection/ pseudo-aneurysm                                                           | Anticoagulation therapy only.                                                                                     |

|                                                                                                                                                                                                                                                          |                                 |                                                 |                                                          |                                                                                                             |
|----------------------------------------------------------------------------------------------------------------------------------------------------------------------------------------------------------------------------------------------------------|---------------------------------|-------------------------------------------------|----------------------------------------------------------|-------------------------------------------------------------------------------------------------------------|
| Vodopivec et al 2013                                                                                                                                                                                                                                     | 53 Male- no commodities         | Occipital headache and sixth nerve palsy        | CTA/ MRA- bilateral cervical ICA dissection.             | Not included in report.                                                                                     |
| O'Hara et al 2012                                                                                                                                                                                                                                        | 43 Male- no comorbidities       | Headache and dysarthria                         | MRI head/ CTA- R ICA dissection, no cerebral infarct     | Intravenous anticoagulation and oral antiplatelets.                                                         |
| Todo et al 2012                                                                                                                                                                                                                                          | 57 Male- no comorbidities       | Dysphasia                                       | CTA- bilateral ICA dissections                           | Oral anticoagulation, Thrombectomy and carotid artery stent.                                                |
| <b>Razak et al 2014</b>                                                                                                                                                                                                                                  | <b>41 Male-no comorbidities</b> | <b>L hemiparesis and L visual field deficit</b> | <b>MRI head/ CTA- R ICA dissection and R MCA infarct</b> | <b>Intra-arterial thrombolysis, partial ICA recanalization. Unilateral external approach Styloidectomy.</b> |
| Cano et al 2010                                                                                                                                                                                                                                          | 45 Female- ulcerative colitis   | L orbital pain, R hemiparesis and dysarthria.   | MRI head /CTA- L ICA dissection                          | Oral anticoagulation only.                                                                                  |
| Faivre et al 2009                                                                                                                                                                                                                                        | 60 Male- no comorbidities       | L hemiparesis and frontal headache              | MRI head/CTA- R ICA dissection and R MCA infarct         | Intravenous thrombolysis, oral anticoagulation. Planned Styloidectomy                                       |
| Soo et al 2004                                                                                                                                                                                                                                           | 41 Female- no comorbidities     | Transient visual field loss.                    | MRI head/ MRA- R ICA dissection and no cerebral infarct  | Oral anticoagulation only.                                                                                  |
| Zuber et al 1999                                                                                                                                                                                                                                         | 43 Male- no comorbidities       | Transient visual field loss and dysarthria      | CTA- L ICA dissection.                                   | Oral anticoagulation only.                                                                                  |
| <i>L- Left, R- Right, LOC- Loss of consciousness, CT- Computerised Tomography, MRI- Magnetic Resonance Imaging, CTA- Computer Tomography Angiography, MRA- Magnetic Resonance Angiography, ICA- Internal Carotid Artery, MCA- Middle Cerebral Artery</i> |                                 |                                                 |                                                          |                                                                                                             |
